# Supplementary material for: Au@PtAg core/shell nanorods: tailoring enzyme-like activities via alloying
Source: Royal Society of Chemistry journal article supplement (doi:10.1039/c3ra23215h), 2013-01-01
Supplement: c3ra23215h.pdf [file c3ra23215h.pdf]

## Electronic Supplementary information

### Au@PtAg core/shell nanorods: tailoring enzyme activity via alloying

Xiaona Hu,<sup>a</sup> Aditya Saran,<sup>a</sup> Shuai Hou,<sup>a</sup> Tao Wen,<sup>a</sup> Yinglu Ji,<sup>a</sup> Wenqi Liu,<sup>a</sup> Hui Zhang,<sup>a</sup> Weiwei He,<sup>b</sup> Jun-Jie Yin<sup>\*b</sup> and Xiaochun Wu<sup>\*a</sup>

5

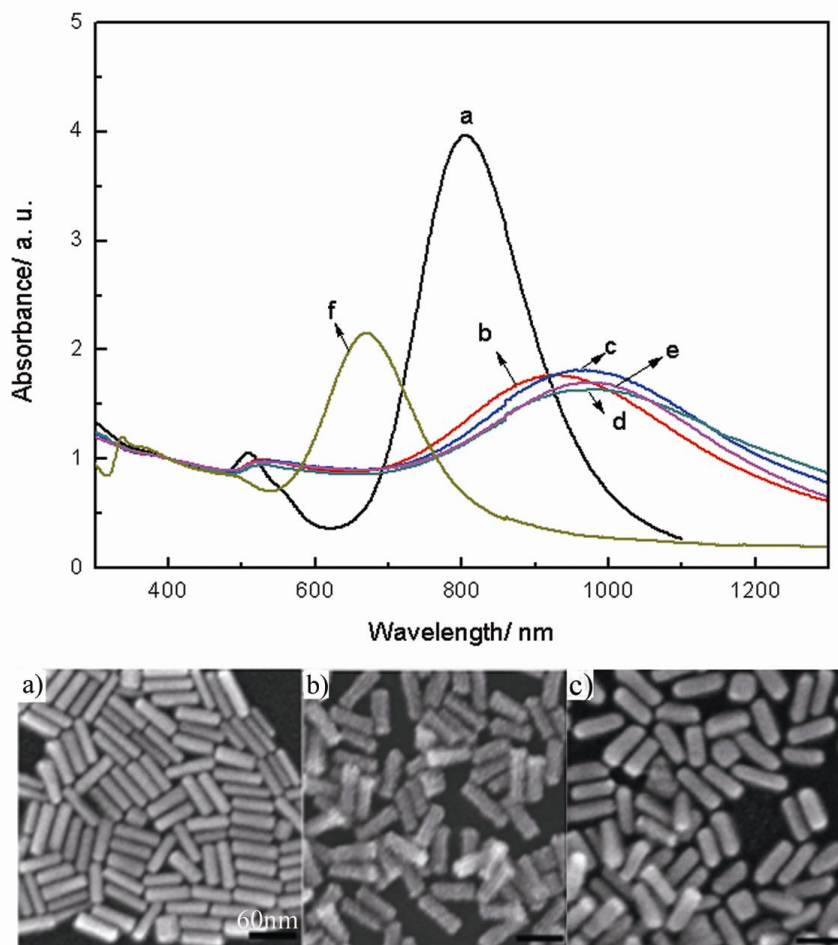

**Fig. S1** UV-vis-NIR spectra of (a) Au NRs, (b) Au@Pt NRs, and (c-f) the Au@PtAg NRs with Ag/(Ag+Pt) ratio of 0.25, 0.5, 0.75, 1 and SEM images of (a) Au NRs, (b) Au@Pt NRs, and (c) Au@Ag NRs.

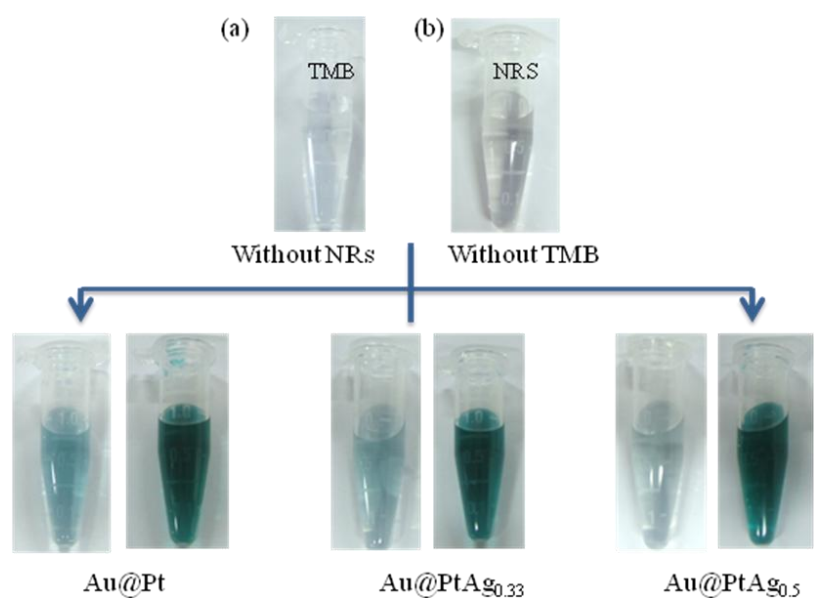

**Fig. S2** Color evolution of TMB oxidation in the presence of either dissolved oxygen or H<sub>2</sub>O<sub>2</sub> under the catalysis of Au@Pt, Au@PtAg<sub>0.33</sub> or Au@PtAg<sub>0.5</sub>. Conditions: [H<sub>2</sub>O<sub>2</sub>] = 0.1 M, [TMB] = 0.3 mM, [NRs] = 0.1 nM at 30°C. The photos were taken at 10 min after the addition of catalyst.

**Table S1.** Composition change measured by EDX before and after leaching of Au@PtAg<sub>3</sub> NRs.

|                 | Ag/Pt | Pt/Au |
|-----------------|-------|-------|
| Before leaching | 2.2   | 0.34  |
| After leaching  | 1.6   | 0.33  |

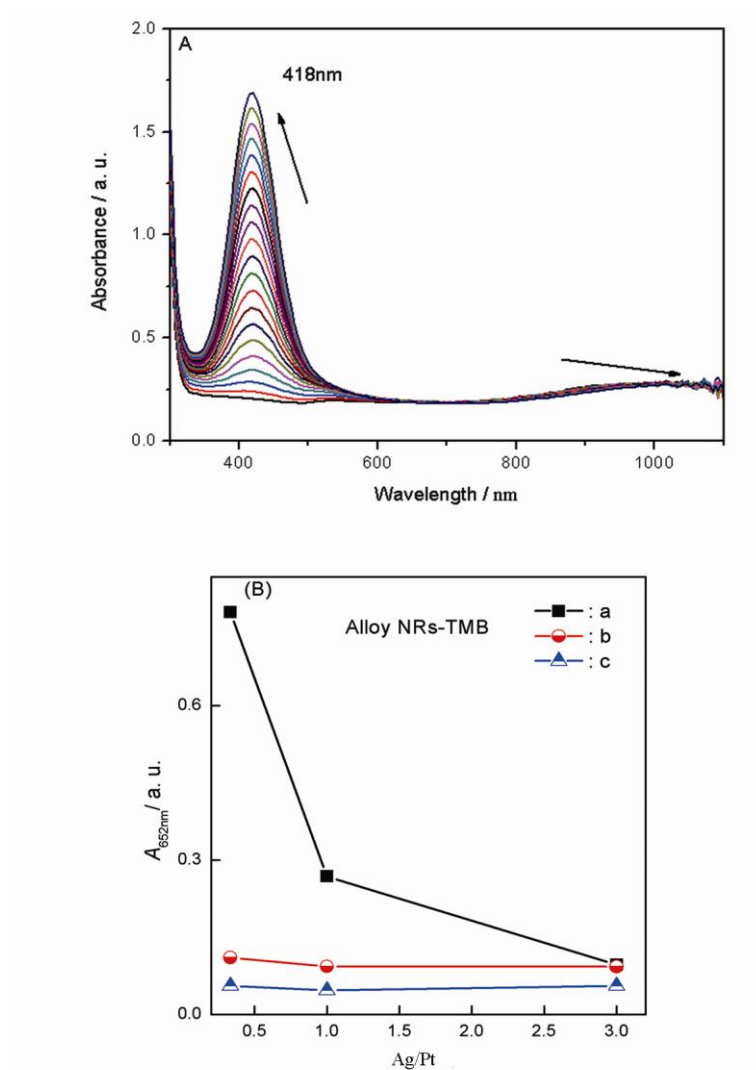

**Fig. S3** (A) Evolution of UV-vis-NIR absorption spectra for OPD oxidation in the presence of Au@PtAg<sub>3</sub> NRs with 1 min interval. (B) Effect of leaching on TMB oxidation. Plot of absorbance at 652 nm after reaction for 20 min versus Ag/Pt ratio: (a) original NRs, (b) supernatants after leaching, and (c) supernatants without leaching.

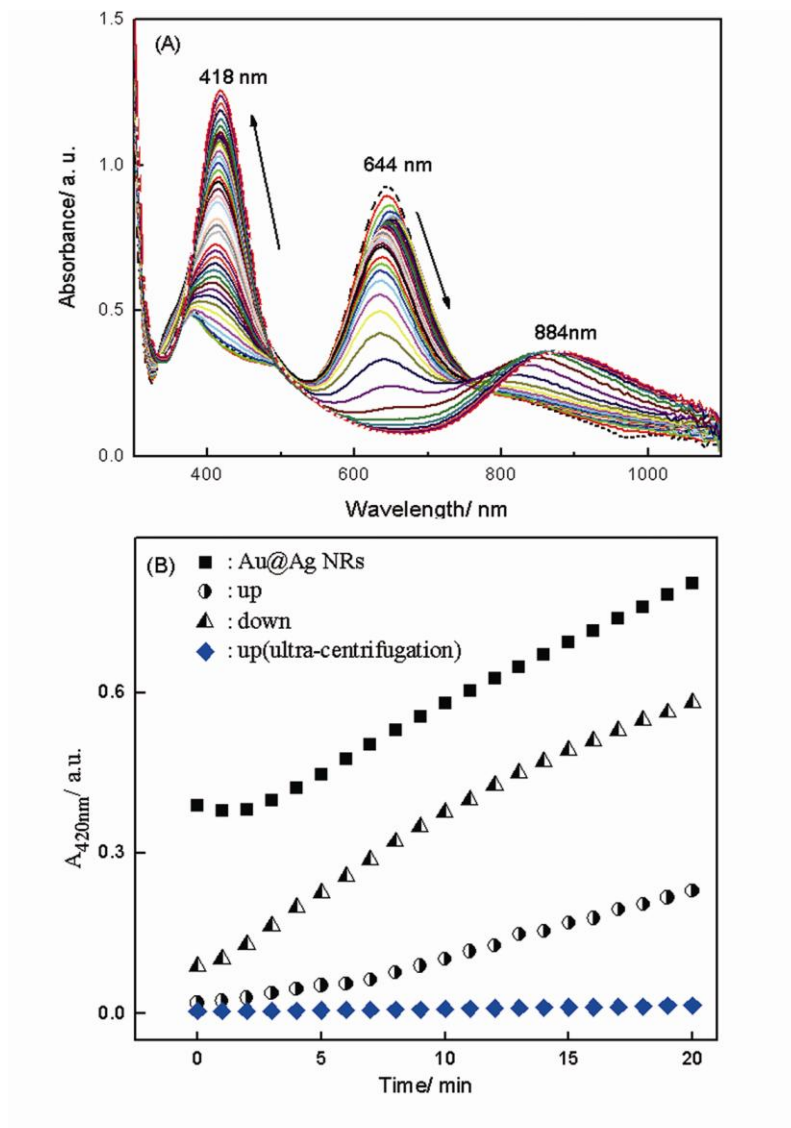

**Fig. S4** (A) Evolution of UV-vis-NIR absorption spectra for OPD oxidation in the presence of Au@Ag NRs with 1 min interval. (B) Au@Ag NRs activity does not result from Ag<sup>+</sup> ions. Color reaction conditions: [H<sub>2</sub>O<sub>2</sub>] = 0.1 M, [OPD] = 0.4 mM, pH = 4.5 at 40°C.

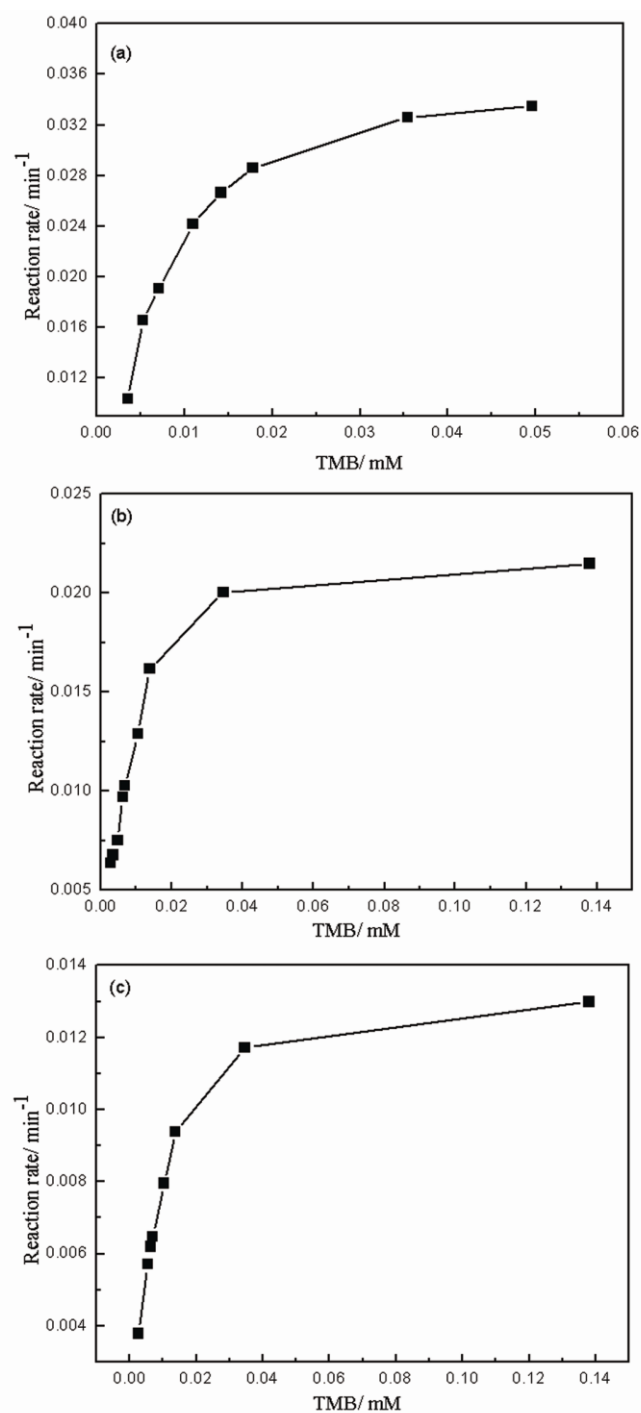

**Fig. S5** Oxidase-like enzyme activities: effect of TMB concentration on initial reaction rate: Au@Pt (a), Au@PtAg<sub>0.33</sub> (b) or Au@PtAg<sub>0.5</sub> (c) NRs.

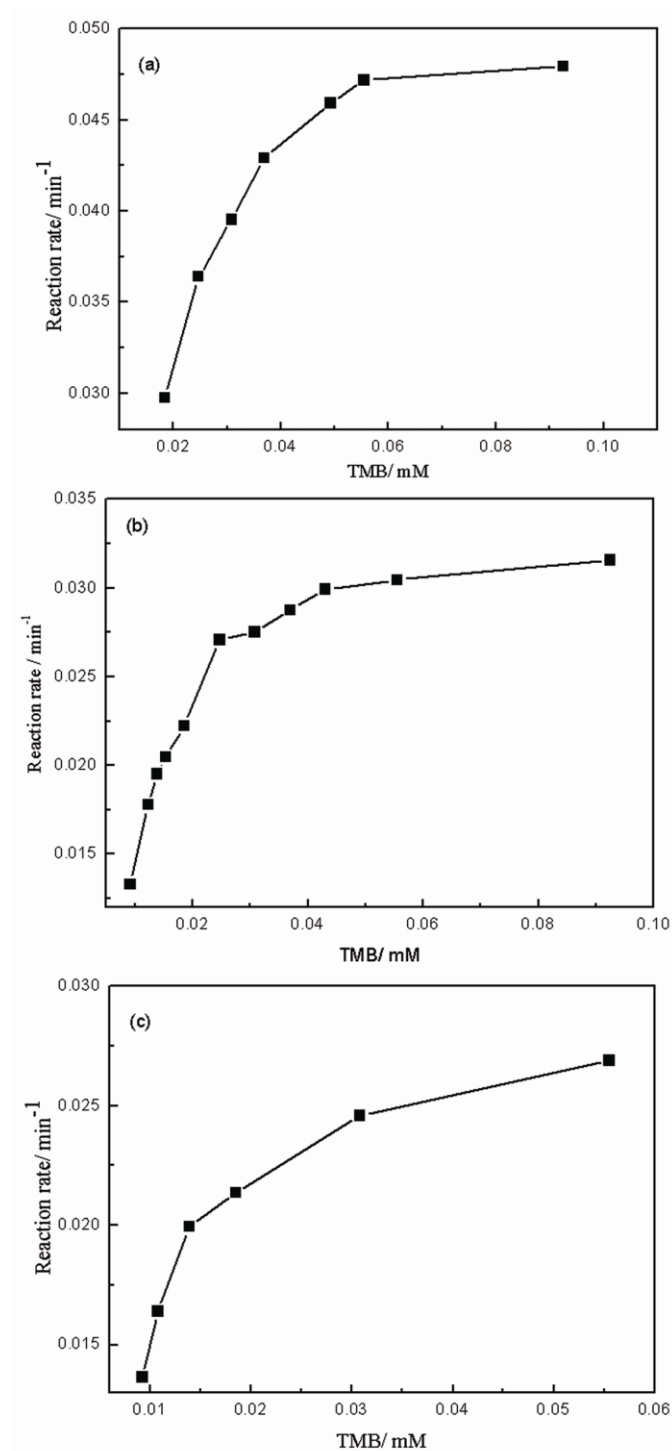

**Fig. S6** Peroxidase-like activities: effect of TMB concentration on initial reaction rate in the presence of hydrogen peroxide ([H<sub>2</sub>O<sub>2</sub>] = 2 mM): (a) Au@Pt, (b) Au@PtAg<sub>0.33</sub> or (c) Au@PtAg<sub>0.5</sub> NRs.

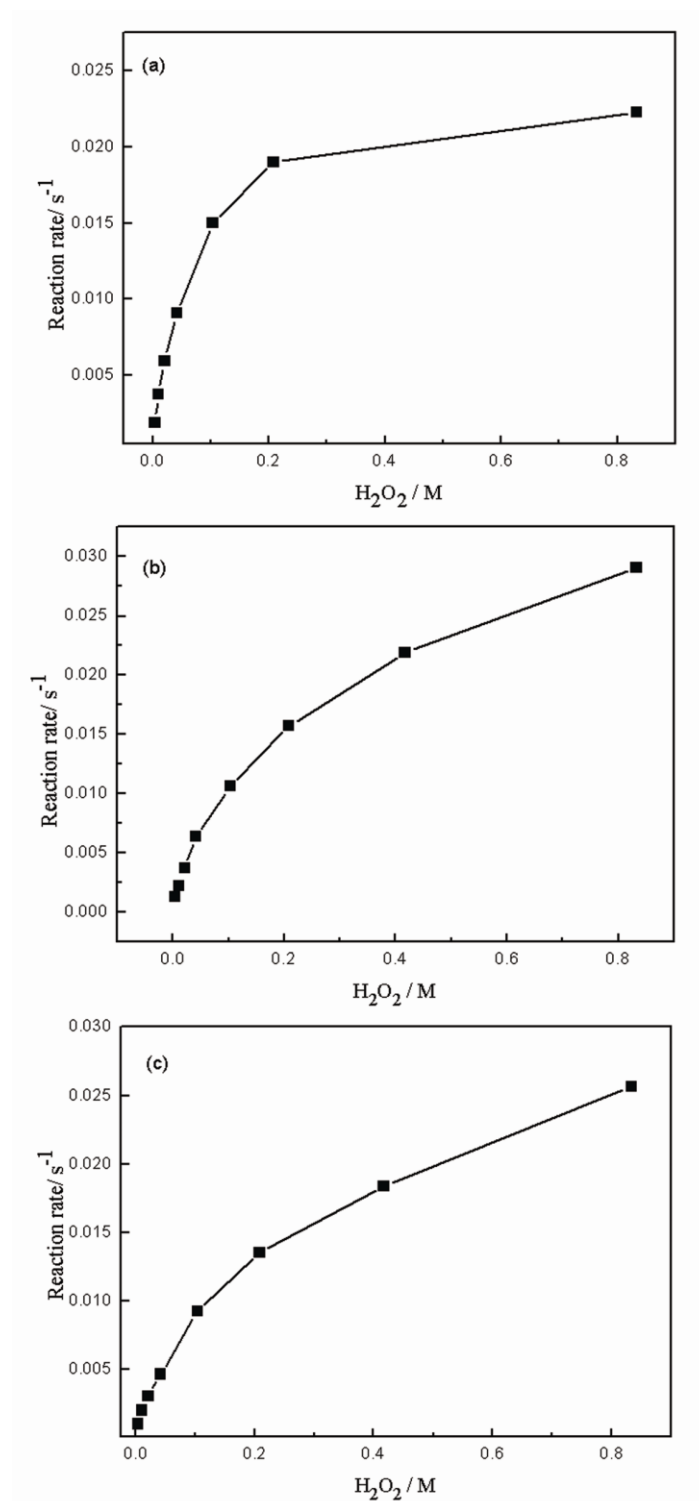

**Fig. S7** Peroxidase-like activities: effect of  $\text{H}_2\text{O}_2$  concentration on the reaction rate: (a) Au@Pt, (b) Au@PtAg<sub>0.33</sub> or (c) Au@PtAg<sub>0.5</sub> NRs, [TMB] = 0.13 mM.

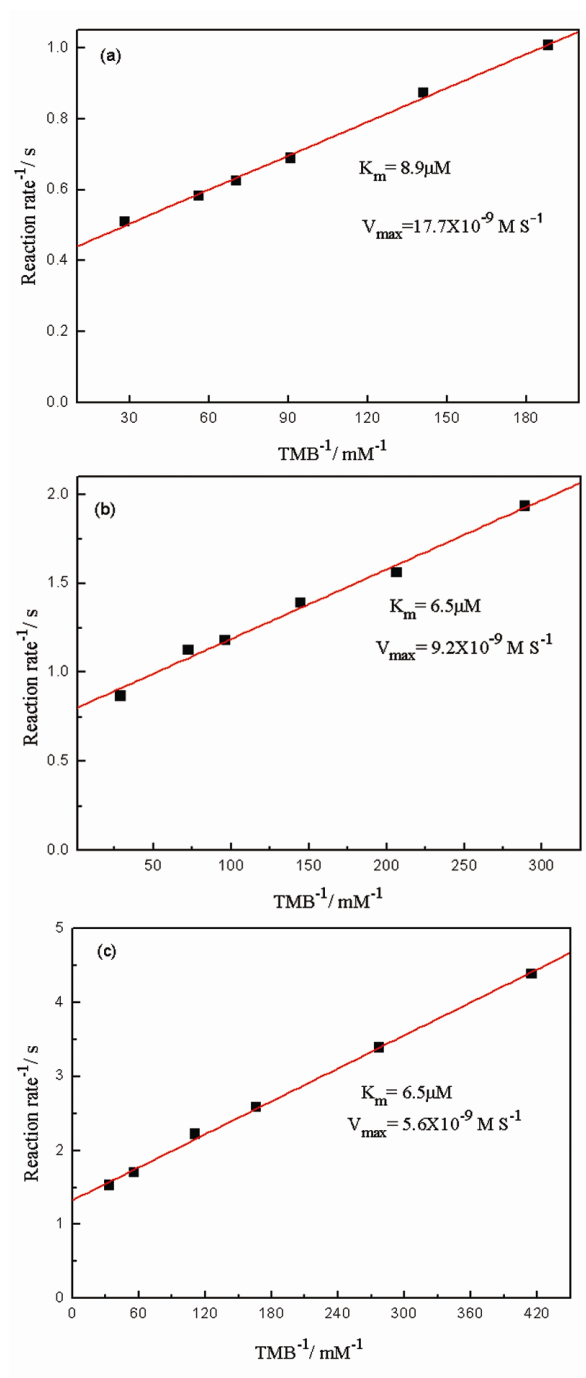

**Fig. S8** Oxidase mimetics: double reciprocal plots of reaction rate versus TMB concentration at a fixed NR concentration for Au@Pt (a), Au@PtAg<sub>0.33</sub> (b) or Au@PtAg<sub>0.5</sub> (c) NRs.



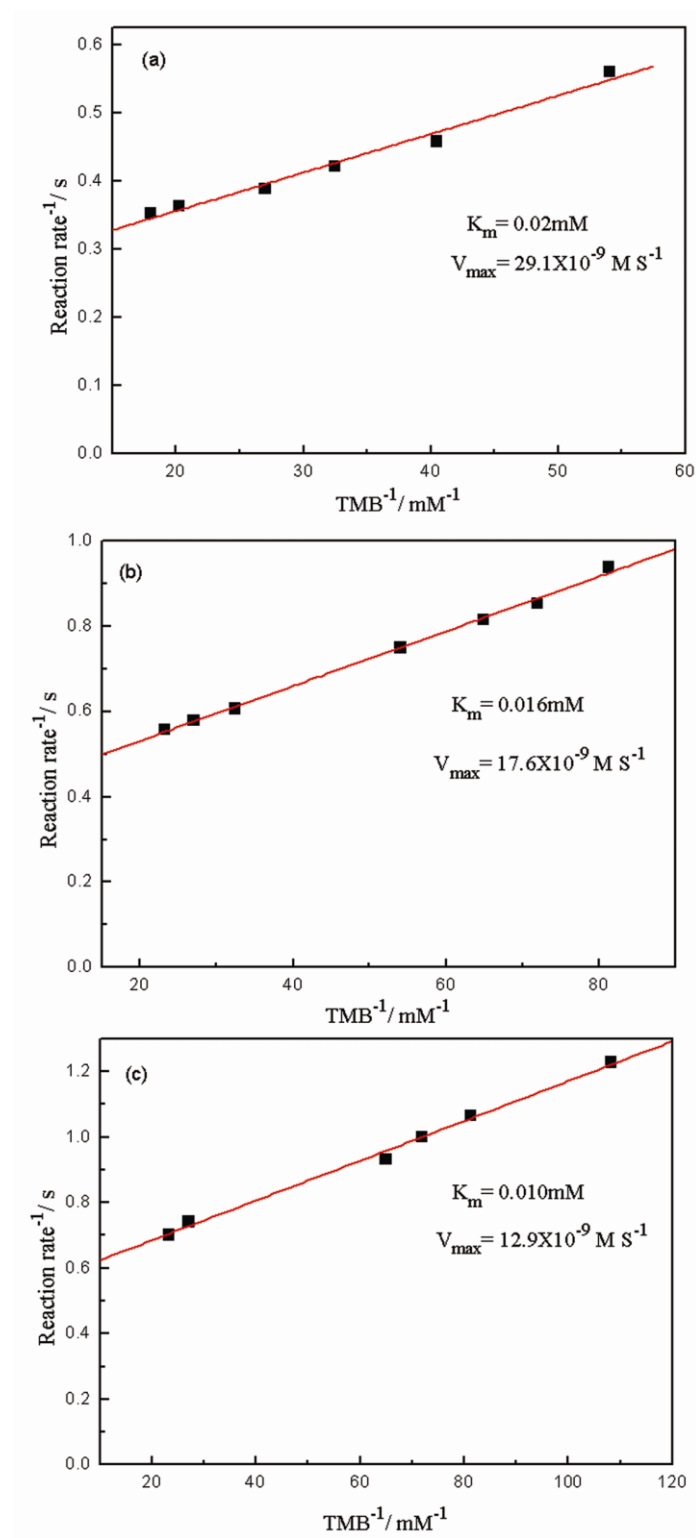

**Fig. S9** Peroxidase mimetics: double reciprocal plots of reaction rate versus TMB concentration at a fixed NR concentration for Au@Pt (a), Au@PtAg<sub>0.33</sub> (b) or Au@PtAg<sub>0.5</sub> (c) NRs.

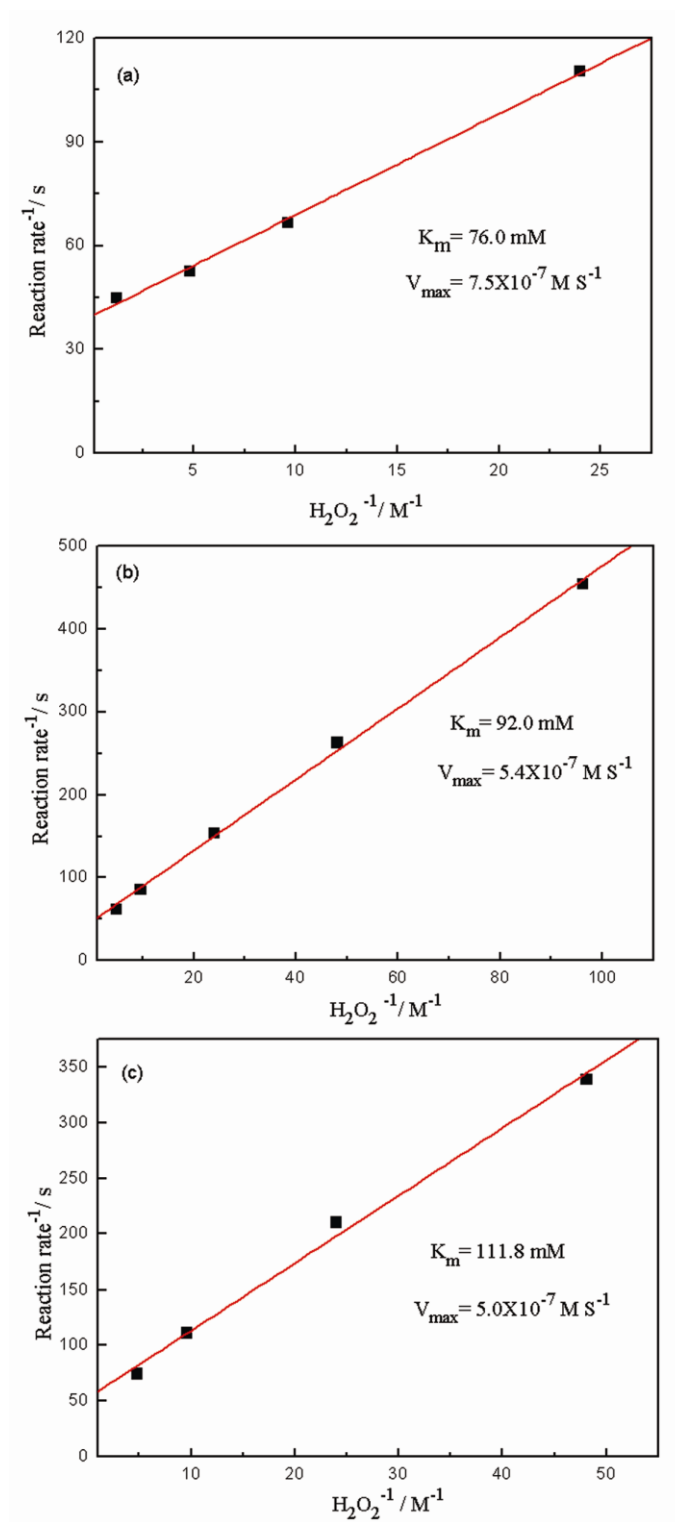

**Fig. S10** Peroxidase mimetics: double reciprocal plots of reaction rate versus  $\text{H}_2\text{O}_2$  concentration at a fixed NR concentration for Au@Pt (a), Au@PtAg<sub>0.33</sub> (b) or Au@PtAg<sub>0.5</sub> (c) NRs.

**Table S2.** Electrochemical parameters calculated from H adsorption/desorption cyclic voltammograms taken in sulfuric acid solution.

|                       | Ratio     | $Q_H$<br>[mC cm <sup>-2</sup> ] | $N_H$   | EAS<br>[m <sup>2</sup> g <sup>-1</sup> ] |
|-----------------------|-----------|---------------------------------|---------|------------------------------------------|
| Au@AgPt<br>Pt/Au=0.27 | 0         | 0.91                            | 5.69E18 | 13.6                                     |
|                       | Pt/Ag=4/1 | 1.17                            | 7.31E18 | 17.5                                     |
|                       | Pt/Ag=3/1 | 1.3                             | 8.13E18 | 19.4                                     |
|                       | Pt/Ag=2/1 | 1.3                             | 8.13E18 | 19.4                                     |

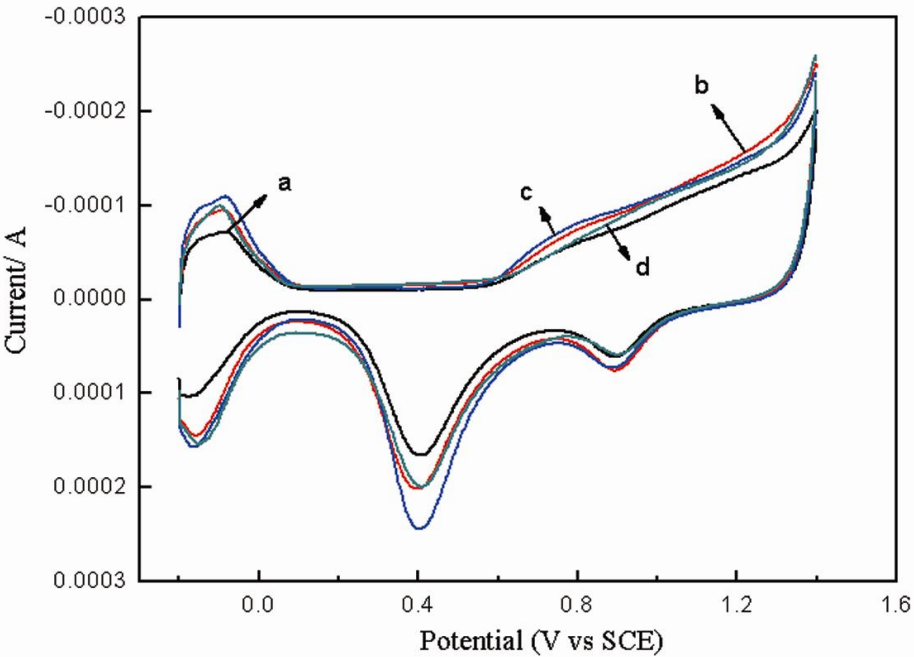

**Fig. S11** CVs of Au@Pt NR-modified (a) and Au@PtAg NR-modified glass carbon electrodes (b-d) in 0.5 M H<sub>2</sub>SO<sub>4</sub> solution taken at a scan rate of 50 mV s<sup>-1</sup>. The Pt/Ag ratio is 4/1(b), 3/1(c), 2/1(d).

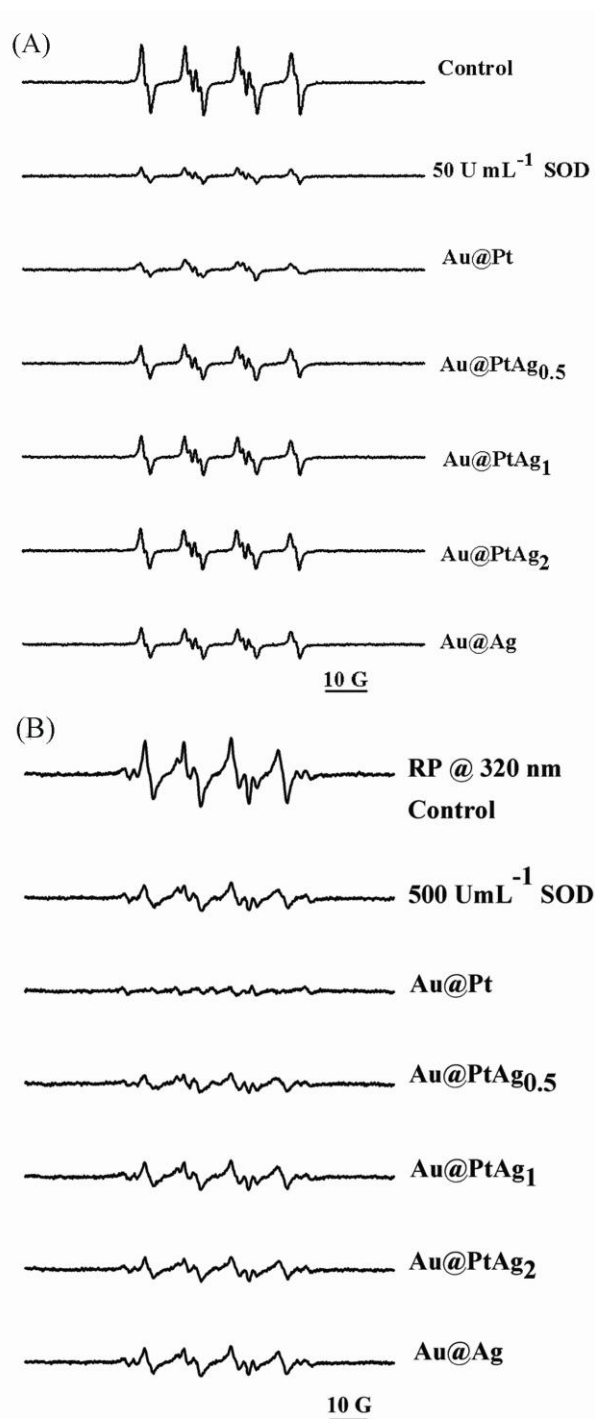

**Fig. S12** ESR spectra of BMPO/•OOH for testing superoxide radical scavenging activity of the alloy NRs. (A) samples contained 25 mM BMPO, 2.5 mM KO<sub>2</sub>, 0.35 mM 18-Crown-6, 20% (v/v) DMSO, and 5 nM alloy NRs or 50 U mL<sup>-1</sup> SOD in 50 mM PBS buffer (pH 7.4). The ESR spectra were recorded after 3 min of addition of KO<sub>2</sub>. (B) samples contained 4 nM various alloy NRs or 500 U mL<sup>-1</sup> SOD, 20 mM BMPO, and 0.15 mg mL<sup>-1</sup> RP in 70% (v/v) ethanol. Samples were irradiated at a wavelength of 320 nm for 10 min. The ESR spectra were scanned for 9 scans.

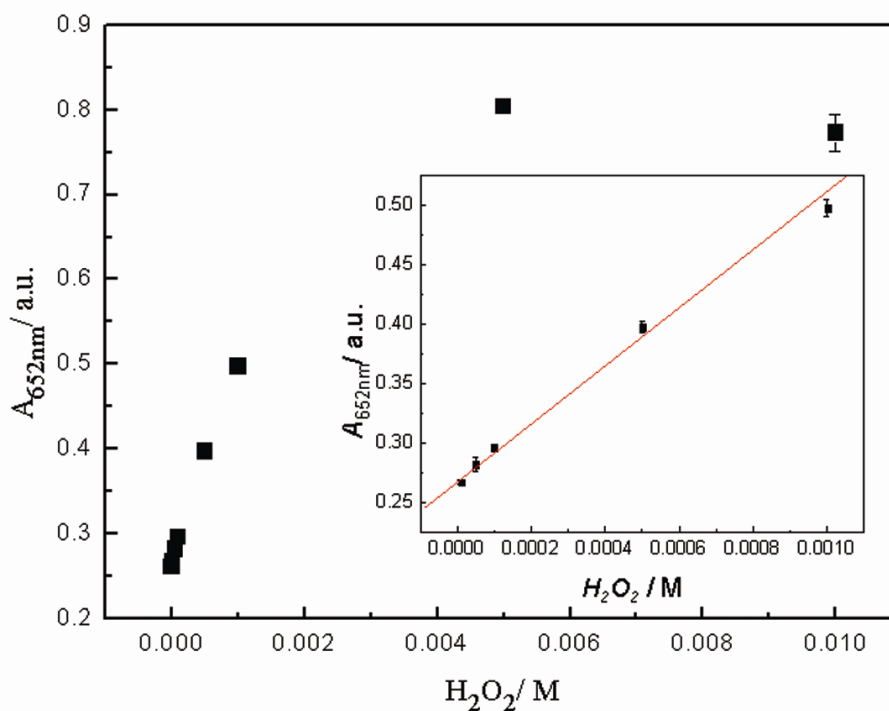

**Fig. S13** Dose-response curve for  $\text{H}_2\text{O}_2$  detection using Au@Pt NRs as peroxidase Mimetics. Inset: the linear calibration plot for  $\text{H}_2\text{O}_2$ . The error bars represent the standard deviation of three measurements. Reaction conditions:  $T=37^\circ\text{C}$ ,  $\text{pH } 4.5$ ,  $[\text{TMB}] = 0.1 \text{ mM}$ .  $\text{Pt}^{2+}/\text{Au}$  was fixed at 0.27.

5

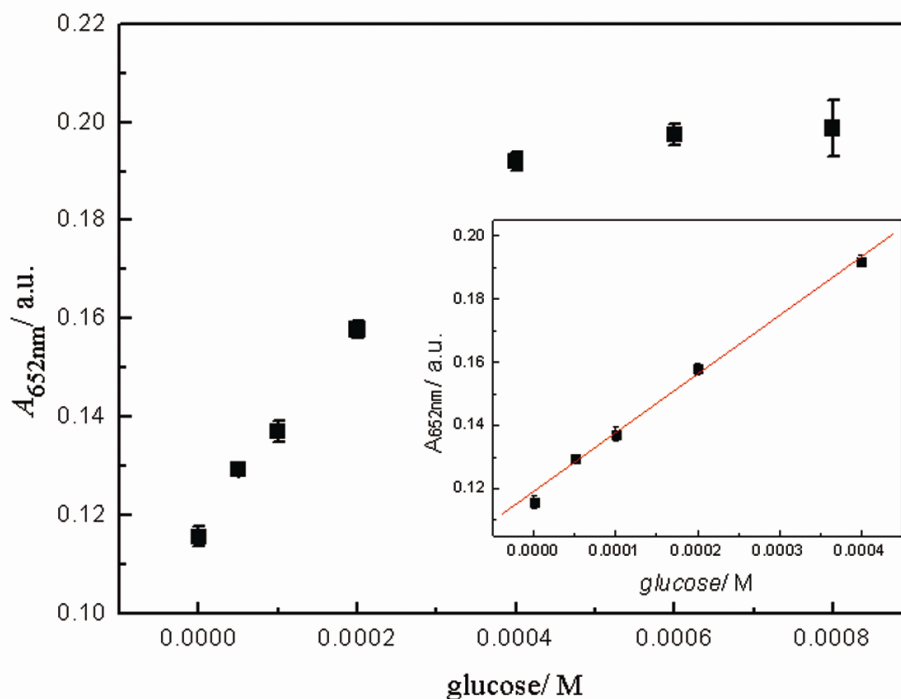

**Fig. S14** Dose-response curve for glucose detection using the combination of Au@Pt NRs and GOx. Inset: the linear calibration plot for glucose detection. The error bars represent the standard deviation of three measurements. Reaction conditions:  $T=37^\circ\text{C}$ ,  $\text{pH } 4.5$ ,  $[\text{TMB}] = 0.1 \text{ mM}$ .  $\text{Pt}^{2+}/\text{Au}$  was fixed at 0.27.

10
